# Supplementary material for: Berberine alters gut microbial function through modulation of bile acids
Source: PubMed Central journal article supplement (PMC7798349; doi:10.1186/s12866-020-02020-1), 2021-01-11

# Serum

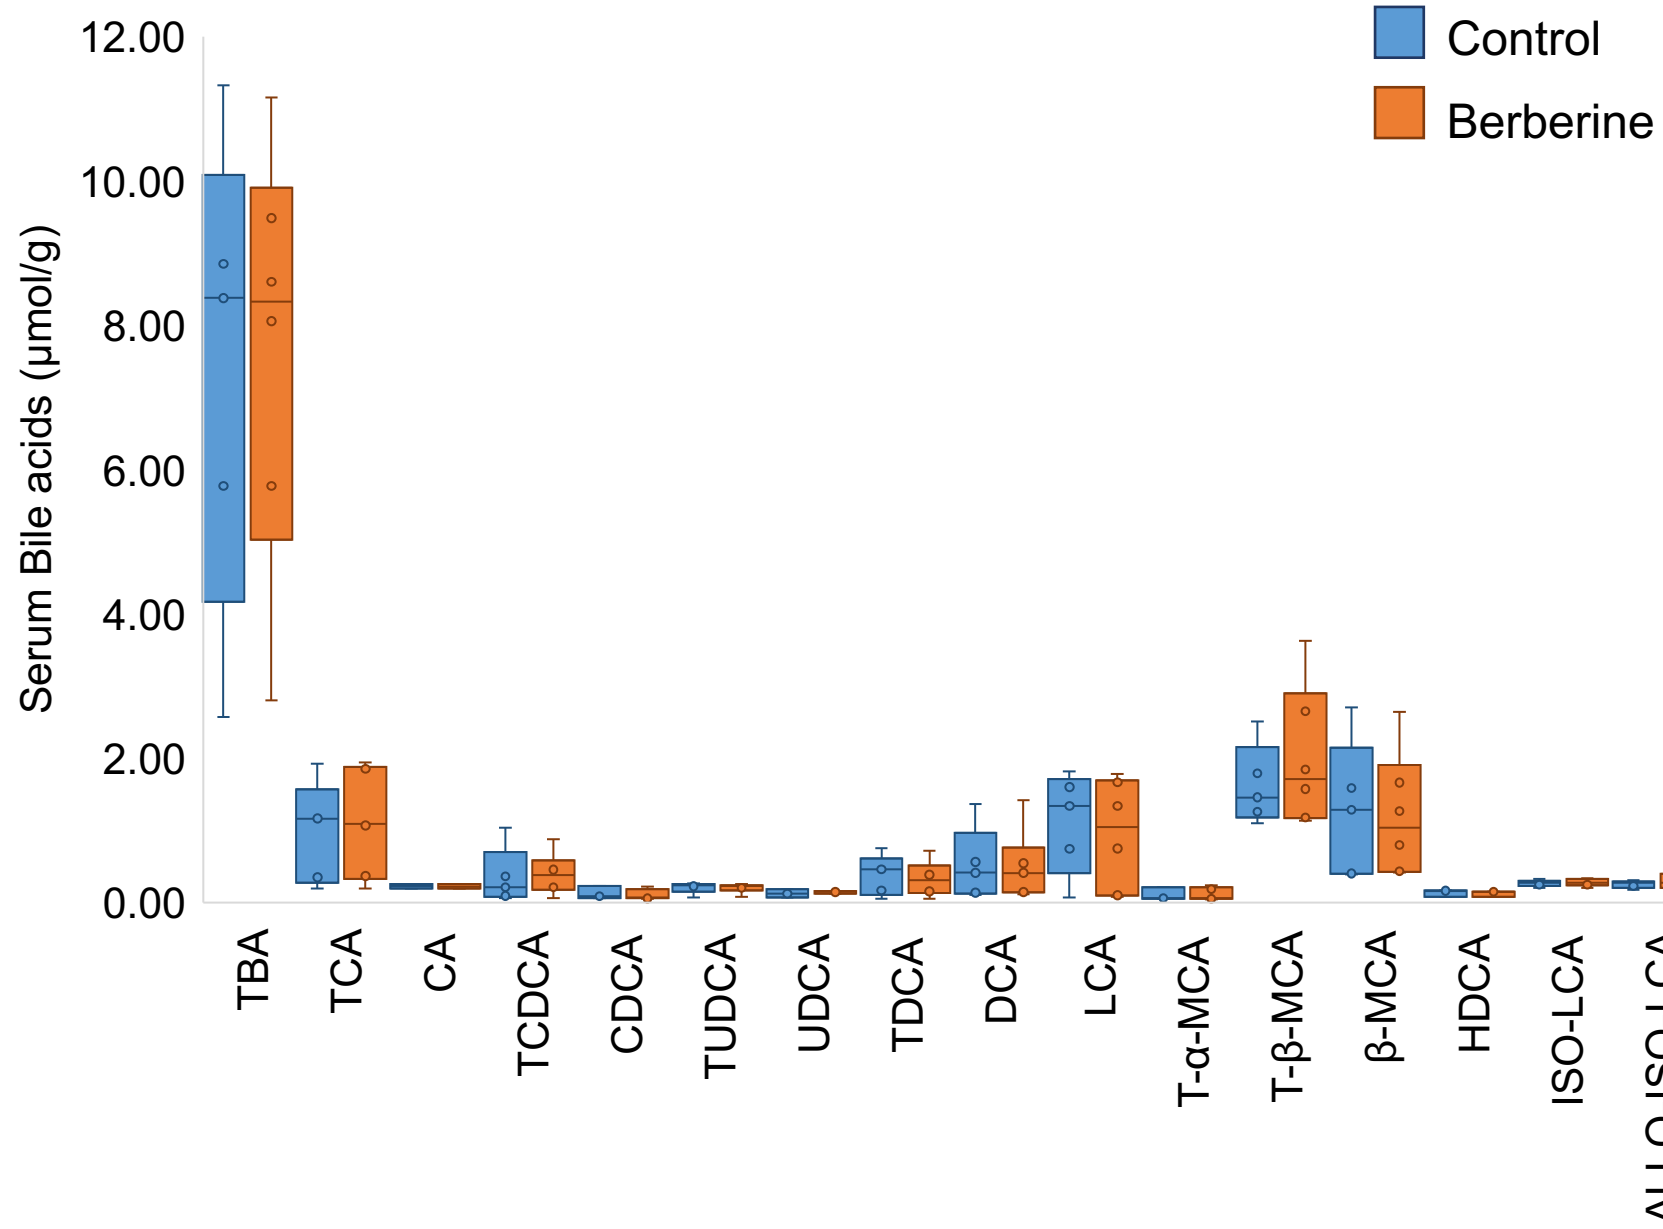

Supplement: 12866_2020_2020_MOESM3_ESM.pdf [file 12866_2020_2020_MOESM3_ESM.pdf]
